# Supplementary material
Source: PubMed Central journal article supplement (PMC6450282)
Supplement: jamapsychiatry-76-391-s001.pdf [file jamapsychiatry-76-391-s001.pdf]

## Supplementary Online Content

Schmidt RJ, Iosif A-M, Guerrero Angel E, Ozonoff S. Association of maternal prenatal vitamin use with risk for autism spectrum disorder recurrence in young siblings. *JAMA Psychiatry*. Published online February 27, 2019. doi:10.1001/jamapsychiatry.2018.3901

**eMethods.** MARBLES Interview Questions on Vitamins and Supplements

**eFigure 1.** Unadjusted Relative Risk for Associations of Maternal Prenatal Vitamin Use (Yes versus No) For Each Month From 6 Months Before Pregnancy Through the End of Pregnancy With Child 36-month Outcomes of Autism Spectrum Disorder (ASD) and Nontypical Development (Non-TD) Versus Typical Development.

**eFigure 2.** Adjusted Relative Risk for Associations of Maternal Prenatal Vitamin Use (Yes versus No) For Each Month From 6 Months Before Pregnancy Through the End of Pregnancy With Child 36-month Outcomes of Autism Spectrum Disorder (ASD) and Nontypical Development (Non-TD) Versus Typical Development.

**eTable 1.** Results of the Sensitivity Analyses Using MLE and TMLE Approaches for the 233 Participants With Complete Covariate Data

**eTable 2.** Stratified Unadjusted and Adjusted Associations of Maternal Prenatal Vitamin Use in the First Month of Pregnancy and Child 36-month Outcomes

**eTable 3.** Results of the Sensitivity Analyses Examining Associations of Maternal Mean Daily Intake of Folic Acid and Iron Supplements in the First Month of Pregnancy With Child 36-month Outcomes Using MLE and TMLE Approaches for the 233 Participants With Complete Covariate Data

This supplementary material has been provided by the authors to give readers additional information about their work.

**eMethods. MARBLES Interview Questions on Vitamins and Supplements.**

Interview 1: Environmental Exposures Questionnaire, First Trimester

**The next questions are about prenatal vitamins and other supplements you may have taken.**

| 34a. Since 6 months before this pregnancy until now have you taken any.... | 34b. What was the brand name you took? | 34c. During which months did you take (VITAMIN/ Supp)? | 34d. How often/number of capsules                                                                                                                                                                                   |
|----------------------------------------------------------------------------|----------------------------------------|--------------------------------------------------------|---------------------------------------------------------------------------------------------------------------------------------------------------------------------------------------------------------------------|
| Prenatal vitamins                                                          | Y N<br>RF DK                           | -6 -5 -4 -3 -2<br>-1 1 2 3 4 5<br>6 7 8 9<br>RF DK     | ____ tablets/capsules per day, for ____ days<br>____ tablets/capsules per week<br>____ tablets/capsules per month<br>____ tablets/capsules everyday<br>Other, specify _____<br>____ RF                      ____ DK |
| Multivitamins                                                              | Y N<br>RF DK                           | -6 -5 -4 -3 -2<br>-1 1 2 3 4 5<br>6 7 8 9<br>RF DK     | ____ tablets/capsules per day, for ____ days<br>____ tablets/capsules per week<br>____ tablets/capsules per month<br>____ tablets/capsules everyday<br>Other, specify _____<br>____ RF                      ____ DK |
| Vitamin A                                                                  | Y N<br>RF DK                           | -6 -5 -4 -3 -2<br>-1 1 2 3 4 5<br>6 7 8 9<br>RF DK     | ____ tablets/capsules per day, for ____ days<br>____ tablets/capsules per week<br>____ tablets/capsules per month<br>____ tablets/capsules everyday<br>Other, specify _____<br>____ RF                      ____ DK |
| Vitamin B6                                                                 | Y N<br>RF DK                           | -6 -5 -4 -3 -2<br>-1 1 2 3 4 5<br>6 7 8 9<br>RF DK     | ____ tablets/capsules per day, for ____ days<br>____ tablets/capsules per week<br>____ tablets/capsules per month<br>____ tablets/capsules everyday<br>Other, specify _____<br>____ RF                      ____ DK |
| Vitamin B12                                                                | Y N<br>RF DK                           | -6 -5 -4 -3 -2<br>-1 1 2 3 4 5<br>6 7 8 9<br>RF DK     | ____ tablets/capsules per day, for ____ days<br>____ tablets/capsules per week<br>____ tablets/capsules per month<br>____ tablets/capsules everyday<br>Other, specify _____<br>____ RF                      ____ DK |
| Folic acid                                                                 | Y N<br>RF DK                           | -6 -5 -4 -3 -2<br>-1 1 2 3 4 5<br>6 7 8 9<br>RF DK     | ____ tablets/capsules per day, for ____ days<br>____ tablets/capsules per week<br>____ tablets/capsules per month<br>____ tablets/capsules everyday<br>Other, specify _____<br>____ RF                      ____ DK |

|                                                              |              |                         |                                                    |                                                                                                                                                                                                     |
|--------------------------------------------------------------|--------------|-------------------------|----------------------------------------------------|-----------------------------------------------------------------------------------------------------------------------------------------------------------------------------------------------------|
| Vitamin C                                                    | Y N<br>RF DK |                         | -6 -5 -4 -3 -2<br>-1 1 2 3 4 5<br>6 7 8 9<br>RF DK | ____ tablets/capsules per day, for ____ days<br>____ tablets/capsules per week<br>____ tablets/capsules per month<br>____ tablets/capsules everyday<br>Other, specify _____<br>____ RF      ____ DK |
| Vitamin D                                                    | Y N<br>RF DK |                         | -6 -5 -4 -3 -2<br>-1 1 2 3 4 5<br>6 7 8 9<br>RF DK | ____ tablets/capsules per day, for ____ days<br>____ tablets/capsules per week<br>____ tablets/capsules per month<br>____ tablets/capsules everyday<br>Other, specify _____<br>____ RF      ____ DK |
| Vitamin E                                                    | Y N<br>RF DK |                         | -6 -5 -4 -3 -2<br>-1 1 2 3 4 5<br>6 7 8 9<br>RF DK | ____ tablets/capsules per day, for ____ days<br>____ tablets/capsules per week<br>____ tablets/capsules per month<br>____ tablets/capsules everyday<br>Other, specify _____<br>____ RF      ____ DK |
| Iron                                                         | Y N<br>RF DK |                         | -6 -5 -4 -3 -2<br>-1 1 2 3 4 5<br>6 7 8 9<br>RF DK | ____ tablets/capsules per day, for ____ days<br>____ tablets/capsules per week<br>____ tablets/capsules per month<br>____ tablets/capsules everyday<br>Other, specify _____<br>____ RF      ____ DK |
| Calcium                                                      | Y N<br>RF DK |                         | -6 -5 -4 -3 -2<br>-1 1 2 3 4 5<br>6 7 8 9<br>RF DK | ____ tablets/capsules per day, for ____ days<br>____ tablets/capsules per week<br>____ tablets/capsules per month<br>____ tablets/capsules everyday<br>Other, specify _____<br>____ RF      ____ DK |
| Zinc                                                         | Y N<br>RF DK |                         | -6 -5 -4 -3 -2<br>-1 1 2 3 4 5<br>6 7 8 9<br>RF DK | ____ tablets/capsules per day, for ____ days<br>____ tablets/capsules per week<br>____ tablets/capsules per month<br>____ tablets/capsules everyday<br>Other, specify _____<br>____ RF      ____ DK |
| Cereals                                                      | Y N<br>RF DK | _____<br>_____<br>_____ | -6 -5 -4 -3 -2<br>-1 1 2 3 4 5<br>6 7 8 9<br>RF DK | ____ cups per day<br>____ cups per week<br>____ cups per month<br>____ RF      ____ DK                                                                                                              |
| Other supplements e.g. Slim Fast, Instant Breakfast, protein | Y N<br>RF DK |                         | -6 -5 -4 -3 -2<br>-1 1 2 3 4 5<br>6 7 8 9<br>RF DK | ____ tablets/capsules per day, for ____ days<br>____ tablets/capsules per week<br>____ tablets/capsules per month<br>____ tablets/capsules everyday<br>Other, specify _____                         |

|                               |                            |  |                                                    |                                                                                                                                                                                                   |
|-------------------------------|----------------------------|--|----------------------------------------------------|---------------------------------------------------------------------------------------------------------------------------------------------------------------------------------------------------|
| powder, brewer's yeast        |                            |  |                                                    | ____RF      ____DK                                                                                                                                                                                |
| St. John's worts              | <b>Y N</b><br><b>RF DK</b> |  | -6 -5 -4 -3 -2<br>-1 1 2 3 4 5<br>6 7 8 9<br>RF DK | ____ tablets/capsules per day, for ____ days<br>____ tablets/capsules per week<br>____ tablets/capsules per month<br>____ tablets/capsules everyday<br>Other, specify _____<br>____RF      ____DK |
| Ginseng                       | <b>Y N</b><br><b>RF DK</b> |  | -6 -5 -4 -3 -2<br>-1 1 2 3 4 5<br>6 7 8 9<br>RF DK | ____ tablets/capsules per day, for ____ days<br>____ tablets/capsules per week<br>____ tablets/capsules per month<br>____ tablets/capsules everyday<br>Other, specify _____<br>____RF      ____DK |
| Omega-3 Fatty Acids           | <b>Y N</b><br><b>RF DK</b> |  | -6 -5 -4 -3 -2<br>-1 1 2 3 4 5<br>6 7 8 9<br>RF DK | ____ tablets/capsules per day, for ____ days<br>____ tablets/capsules per week<br>____ tablets/capsules per month<br>____ tablets/capsules everyday<br>Other, specify _____<br>____RF      ____DK |
| Fish oil                      | <b>Y N</b><br><b>RF DK</b> |  | -6 -5 -4 -3 -2<br>-1 1 2 3 4 5<br>6 7 8 9<br>RF DK | ____ tablets/capsules per day, for ____ days<br>____ tablets/capsules per week<br>____ tablets/capsules per month<br>____ tablets/capsules everyday<br>Other, specify _____<br>____RF      ____DK |
| Other supplements or vitamins | <b>Y N</b><br><b>RF DK</b> |  | -6 -5 -4 -3 -2<br>-1 1 2 3 4 5<br>6 7 8 9<br>RF DK | ____ tablets/capsules per day, for ____ days<br>____ tablets/capsules per week<br>____ tablets/capsules per month<br>____ tablets/capsules everyday<br>Other, specify _____<br>____RF      ____DK |

Interview 2: Environmental Exposures Questionnaire, Third Trimester

**The next questions are about prenatal vitamins and other supplements you may have taken.**

| 35a. Since the last time we spoke have you taken any.... | b. What was the brand name you took? | c. During which months did you take (VITAMIN/Supp)? | d. How often/number of capsules                                                                                                                                                                          |
|----------------------------------------------------------|--------------------------------------|-----------------------------------------------------|----------------------------------------------------------------------------------------------------------------------------------------------------------------------------------------------------------|
| Prenatal vitamins <b>Y N</b><br><b>RF DK</b>             |                                      | 3 4 5 6 7<br><br>8 9 RF DK                          | _____ tablets/capsules per day, for _____ days<br>_____ tablets/capsules per week<br>_____ tablets/capsules per month<br>_____ tablets/capsules everyday<br>Other, specify _____<br>_____DK      _____RF |
| Multivitamins <b>Y N</b><br><b>RF DK</b>                 |                                      | 3 4 5 6 7<br><br>8 9 RF DK                          | _____ tablets/capsules per day, for _____ days<br>_____ tablets/capsules per week<br>_____ tablets/capsules per month<br>_____ tablets/capsules everyday<br>Other, specify _____<br>_____DK      _____RF |
| Vitamin A <b>Y N</b><br><b>RF DK</b>                     |                                      | 3 4 5 6 7<br><br>8 9 RF DK                          | _____ tablets/capsules per day, for _____ days<br>_____ tablets/capsules per week<br>_____ tablets/capsules per month<br>_____ tablets/capsules everyday<br>Other, specify _____<br>_____DK      _____RF |
| Vitamin B6 <b>Y N</b><br><b>RF DK</b>                    |                                      | 3 4 5 6 7<br><br>8 9 RF DK                          | _____ tablets/capsules per day, for _____ days<br>_____ tablets/capsules per week<br>_____ tablets/capsules per month<br>_____ tablets/capsules everyday<br>Other, specify _____                         |

|             |                            |  | ____DK      ____RF                                                                                                                                                                                                              |
|-------------|----------------------------|--|---------------------------------------------------------------------------------------------------------------------------------------------------------------------------------------------------------------------------------|
| Vitamin B12 | <b>Y N</b><br><b>RF DK</b> |  | 3 4 5 6 7<br><br>8 9 RF DK<br><br>____tablets/capsules per day, for ____ days<br>____tablets/capsules per week<br>____tablets/capsules per month<br>____tablets/capsules everyday<br>Other, specify _____<br>____DK      ____RF |
| Folic acid  | <b>Y N</b><br><b>RF DK</b> |  | 3 4 5 6 7<br><br>8 9 RF DK<br><br>____tablets/capsules per day, for ____ days<br>____tablets/capsules per week<br>____tablets/capsules per month<br>____tablets/capsules everyday<br>Other, specify _____<br>____DK      ____RF |
| Vitamin C   | <b>Y N</b><br><b>RF DK</b> |  | 3 4 5 6 7<br><br>8 9 RF DK<br><br>____tablets/capsules per day, for ____ days<br>____tablets/capsules per week<br>____tablets/capsules per month<br>____tablets/capsules everyday<br>Other, specify _____<br>____DK      ____RF |
| Vitamin D   | <b>Y N</b><br><b>RF DK</b> |  | 3 4 5 6 7<br><br>8 9 RF DK<br><br>____tablets/capsules per day, for ____ days<br>____tablets/capsules per week<br>____tablets/capsules per month<br>____tablets/capsules everyday<br>Other, specify _____<br>____DK      ____RF |
| Vitamin E   | <b>Y N</b><br><b>RF DK</b> |  | 3 4 5 6 7<br><br>____tablets/capsules per day, for ____ days<br>____tablets/capsules per week                                                                                                                                   |

|         |                            |                         |                            |                                                                                                                                                                                                      |
|---------|----------------------------|-------------------------|----------------------------|------------------------------------------------------------------------------------------------------------------------------------------------------------------------------------------------------|
|         |                            |                         | 8 9 RF DK                  | _____tablets/capsules per month<br>_____tablets/capsules everyday<br>Other, specify _____<br>_____DK      _____RF                                                                                    |
| Iron    | <b>Y N</b><br><b>RF DK</b> |                         | 3 4 5 6 7<br><br>8 9 RF DK | _____tablets/capsules per day, for _____ days<br>_____tablets/capsules per week<br>_____tablets/capsules per month<br>_____tablets/capsules everyday<br>Other, specify _____<br>_____DK      _____RF |
| Calcium | <b>Y N</b><br><b>RF DK</b> |                         | 3 4 5 6 7<br><br>8 9 RF DK | _____tablets/capsules per day, for _____ days<br>_____tablets/capsules per week<br>_____tablets/capsules per month<br>_____tablets/capsules everyday<br>Other, specify _____<br>_____DK      _____RF |
| Zinc    | <b>Y N</b><br><b>RF DK</b> |                         | 3 4 5 6 7<br><br>8 9 RF DK | _____tablets/capsules per day, for _____ days<br>_____tablets/capsules per week<br>_____tablets/capsules per month<br>_____tablets/capsules everyday<br>Other, specify _____<br>_____DK      _____RF |
| Cereals | <b>Y N</b><br><b>RF DK</b> | _____<br>_____<br>_____ | 3 4 5 6 7<br><br>8 9 RF DK | _____ cups per day<br>_____ cups per week<br>_____ cups per month<br>_____DK      _____RF                                                                                                            |

|                                                                                     |                            |                            |                                                                                                                                                                                                      |
|-------------------------------------------------------------------------------------|----------------------------|----------------------------|------------------------------------------------------------------------------------------------------------------------------------------------------------------------------------------------------|
| Other supplements e.g. Slim Fast, Instant Breakfast, protein powder, brewer's yeast | <b>Y N</b><br><b>RF DK</b> | 3 4 5 6 7<br><br>8 9 RF DK | ____ tablets/capsules per day, for ____ days<br>____ tablets/capsules per week<br>____ tablets/capsules per month<br>____ tablets/capsules everyday<br>Other, specify _____<br>____ DK      _____ RF |
| St. John's worts                                                                    | <b>Y N</b><br><b>RF DK</b> | 3 4 5 6 7<br><br>8 9 RF DK | ____ tablets/capsules per day, for ____ days<br>____ tablets/capsules per week<br>____ tablets/capsules per month<br>____ tablets/capsules everyday<br>Other, specify _____<br>____ DK      _____ RF |
| Ginseng                                                                             | <b>Y N</b><br><b>RF DK</b> | 3 4 5 6 7<br><br>8 9 RF DK | ____ tablets/capsules per day, for ____ days<br>____ tablets/capsules per week<br>____ tablets/capsules per month<br>____ tablets/capsules everyday<br>Other, specify _____<br>____ DK      _____ RF |
| Omega-3 Fatty Acids                                                                 | <b>Y N</b><br><b>RF DK</b> | 3 4 5 6 7<br><br>8 9 RF DK | ____ tablets/capsules per day, for ____ days<br>____ tablets/capsules per week<br>____ tablets/capsules per month<br>____ tablets/capsules everyday<br>Other, specify _____<br>____ DK      _____ RF |
| Fish oil                                                                            | <b>Y N</b><br><b>RF DK</b> | 3 4 5 6 7<br><br>8 9 RF DK | ____ tablets/capsules per day, for ____ days<br>____ tablets/capsules per week<br>____ tablets/capsules per month                                                                                    |



|                               |                            |                            |                                                                                                                                                                                                            |
|-------------------------------|----------------------------|----------------------------|------------------------------------------------------------------------------------------------------------------------------------------------------------------------------------------------------------|
|                               |                            |                            | _____ tablets/capsules everyday<br>Other, specify _____<br>_____ DK      _____ RF                                                                                                                          |
| Other vitamins or supplements | <b>Y N</b><br><b>RF DK</b> | 3 4 5 6 7<br><br>8 9 RF DK | _____ tablets/capsules per day, for _____ days<br>_____ tablets/capsules per week<br>_____ tablets/capsules per month<br>_____ tablets/capsules everyday<br>Other, specify _____<br>_____ DK      _____ RF |

Interview 3: Environmental Exposure Questionnaire, 6 months postnatal

The next questions are about prenatal vitamins and other supplements you may have taken.

| 36a. Since the last time we spoke through 6 months post-partum (or the end of BF) have you taken any.... | 36b. What was the brand name you took? | 36c. During which months did you take (VITAMIN/Supp)? | 36d. How often/number of capsules                                                                                                                                                                          |
|----------------------------------------------------------------------------------------------------------|----------------------------------------|-------------------------------------------------------|------------------------------------------------------------------------------------------------------------------------------------------------------------------------------------------------------------|
| Prenatal vitamins                                                                                        |                                        | 4 5 6 7 8 9<br>BF RF DK                               | _____ tablets/capsules per day, for _____ days<br>_____ tablets/capsules per week<br>_____ tablets/capsules per month<br>_____ tablets/capsules everyday<br>Other, specify _____<br>_____ RF      _____ DK |
| Multivitamins (not prenatal)                                                                             | <b>Y N</b><br><b>RF DK</b>             | 4 5 6 7 8 9<br>BF RF DK                               | _____ tablets/capsules per day, for _____ days<br>_____ tablets/capsules per week<br>_____ tablets/capsules per month                                                                                      |

|             |                                      |  |                                                                                                                                                                                                                                               |
|-------------|--------------------------------------|--|-----------------------------------------------------------------------------------------------------------------------------------------------------------------------------------------------------------------------------------------------|
|             |                                      |  | _____ tablets/capsules everyday<br>Other, specify _____<br>_____ RF          _____ DK                                                                                                                                                         |
| Vitamin A   | <b>Y N</b><br><b>RF</b><br><b>DK</b> |  | 4 5 6 7 8 9<br>BF RF DK<br><br>_____ tablets/capsules per day, for _____ days<br>_____ tablets/capsules per week<br>_____ tablets/capsules per month<br>_____ tablets/capsules everyday<br>Other, specify _____<br>_____ RF          _____ DK |
| Vitamin B6  | <b>Y N</b><br><b>RF</b><br><b>DK</b> |  | 4 5 6 7 8 9<br>BF RF DK<br><br>_____ tablets/capsules per day, for _____ days<br>_____ tablets/capsules per week<br>_____ tablets/capsules per month<br>_____ tablets/capsules everyday<br>Other, specify _____<br>_____ RF          _____ DK |
| Vitamin B12 | <b>Y N</b><br><b>RF</b><br><b>DK</b> |  | 4 5 6 7 8 9<br>BF RF DK<br><br>_____ tablets/capsules per day, for _____ days<br>_____ tablets/capsules per week<br>_____ tablets/capsules per month<br>_____ tablets/capsules everyday<br>Other, specify _____<br>_____ RF          _____ DK |

|            |                                      |                         |                                                                                                                                                                                                     |
|------------|--------------------------------------|-------------------------|-----------------------------------------------------------------------------------------------------------------------------------------------------------------------------------------------------|
| Folic acid | <b>Y N</b><br><b>RF</b><br><b>DK</b> | 4 5 6 7 8 9<br>BF RF DK | ____ tablets/capsules per day, for ____ days<br>____ tablets/capsules per week<br>____ tablets/capsules per month<br>____ tablets/capsules everyday<br>Other, specify _____<br>____ RF      ____ DK |
| Vitamin C  | <b>Y N</b><br><b>RF</b><br><b>DK</b> | 4 5 6 7 8 9<br>BF RF DK | ____ tablets/capsules per day, for ____ days<br>____ tablets/capsules per week<br>____ tablets/capsules per month<br>____ tablets/capsules everyday<br>Other, specify _____<br>____ RF      ____ DK |
| Vitamin D  | <b>Y N</b><br><b>RF</b><br><b>DK</b> | 4 5 6 7 8 9<br>BF RF DK | ____ tablets/capsules per day, for ____ days<br>____ tablets/capsules per week<br>____ tablets/capsules per month<br>____ tablets/capsules everyday<br>Other, specify _____<br>____ RF      ____ DK |
| Vitamin E  | <b>Y N</b><br><b>RF</b><br><b>DK</b> | 4 5 6 7 8 9<br>BF RF DK | ____ tablets/capsules per day, for ____ days<br>____ tablets/capsules per week<br>____ tablets/capsules per month                                                                                   |

|         |                                      |  |                                                                                                                                                                                                                                                       |
|---------|--------------------------------------|--|-------------------------------------------------------------------------------------------------------------------------------------------------------------------------------------------------------------------------------------------------------|
|         |                                      |  | _____ tablets/capsules everyday<br>Other, specify _____<br>_____ RF                  _____ DK                                                                                                                                                         |
| Iron    | <b>Y N</b><br><b>RF</b><br><b>DK</b> |  | 4 5 6 7 8 9<br>BF RF DK<br><br>_____ tablets/capsules per day, for _____ days<br>_____ tablets/capsules per week<br>_____ tablets/capsules per month<br>_____ tablets/capsules everyday<br>Other, specify _____<br>_____ RF                  _____ DK |
| Calcium | <b>Y N</b><br><b>RF</b><br><b>DK</b> |  | 4 5 6 7 8 9<br>BF RF DK<br><br>_____ tablets/capsules per day, for _____ days<br>_____ tablets/capsules per week<br>_____ tablets/capsules per month<br>_____ tablets/capsules everyday<br>Other, specify _____<br>_____ RF                  _____ DK |
| Zinc    | <b>Y N</b><br><b>RF</b><br><b>DK</b> |  | 4 5 6 7 8 9<br>BF RF DK<br><br>_____ tablets/capsules per day, for _____ days<br>_____ tablets/capsules per week<br>_____ tablets/capsules per month<br>_____ tablets/capsules everyday<br>Other, specify _____<br>_____ RF                  _____ DK |

|                                                                                                 |                 |                         |                         |                                                                                                                                                                                                     |
|-------------------------------------------------------------------------------------------------|-----------------|-------------------------|-------------------------|-----------------------------------------------------------------------------------------------------------------------------------------------------------------------------------------------------|
|                                                                                                 |                 |                         |                         |                                                                                                                                                                                                     |
| Cereals                                                                                         | Y N<br>RF<br>DK | _____<br>_____<br>_____ | 4 5 6 7 8 9<br>BF RF DK | ____ cups per day<br>____ cups per week<br>____ cups per month<br>____ RF      ____ DK                                                                                                              |
| Other supplements<br>e.g. Slim Fast,<br>Instant Breakfast,<br>protein powder,<br>brewer's yeast | Y N<br>RF<br>DK |                         | 4 5 6 7 8 9<br>BF RF DK | ____ tablets/capsules per day, for ____ days<br>____ tablets/capsules per week<br>____ tablets/capsules per month<br>____ tablets/capsules everyday<br>Other, specify _____<br>____ RF      ____ DK |
| St. John's worts                                                                                | Y N<br>RF<br>DK |                         | 4 5 6 7 8 9<br>BF RF DK | ____ tablets/capsules per day, for ____ days<br>____ tablets/capsules per week<br>____ tablets/capsules per month<br>____ tablets/capsules everyday<br>Other, specify _____<br>____ RF      ____ DK |
| Ginseng                                                                                         | Y N<br>RF<br>DK |                         | 4 5 6 7 8 9<br>BF RF DK | ____ tablets/capsules per day, for ____ days<br>____ tablets/capsules per week<br>____ tablets/capsules per month<br>____ tablets/capsules everyday<br>Other, specify _____<br>____ RF      ____ DK |

|                               |                 |  |                                                                                                                                                                                                                                    |
|-------------------------------|-----------------|--|------------------------------------------------------------------------------------------------------------------------------------------------------------------------------------------------------------------------------------|
|                               |                 |  |                                                                                                                                                                                                                                    |
| Omega-3 Fatty Acids           | Y N<br>RF<br>DK |  | 4 5 6 7 8 9<br>BF RF DK<br><br>____ tablets/capsules per day, for ____ days<br>____ tablets/capsules per week<br>____ tablets/capsules per month<br>____ tablets/capsules everyday<br>Other, specify _____<br>____ RF      ____ DK |
| Fish oil                      | Y N<br>RF<br>DK |  | 4 5 6 7 8 9<br>BF RF DK<br><br>____ tablets/capsules per day, for ____ days<br>____ tablets/capsules per week<br>____ tablets/capsules per month<br>____ tablets/capsules everyday<br>Other, specify _____<br>____ RF      ____ DK |
| Other vitamins or supplements | Y N<br>RF<br>DK |  | 4 5 6 7 8 9<br>BF RF DK<br><br>____ tablets/capsules per day, for ____ days<br>____ tablets/capsules per week<br>____ tablets/capsules per month<br>____ tablets/capsules everyday<br>Other, specify _____<br>____ RF      ____ DK |

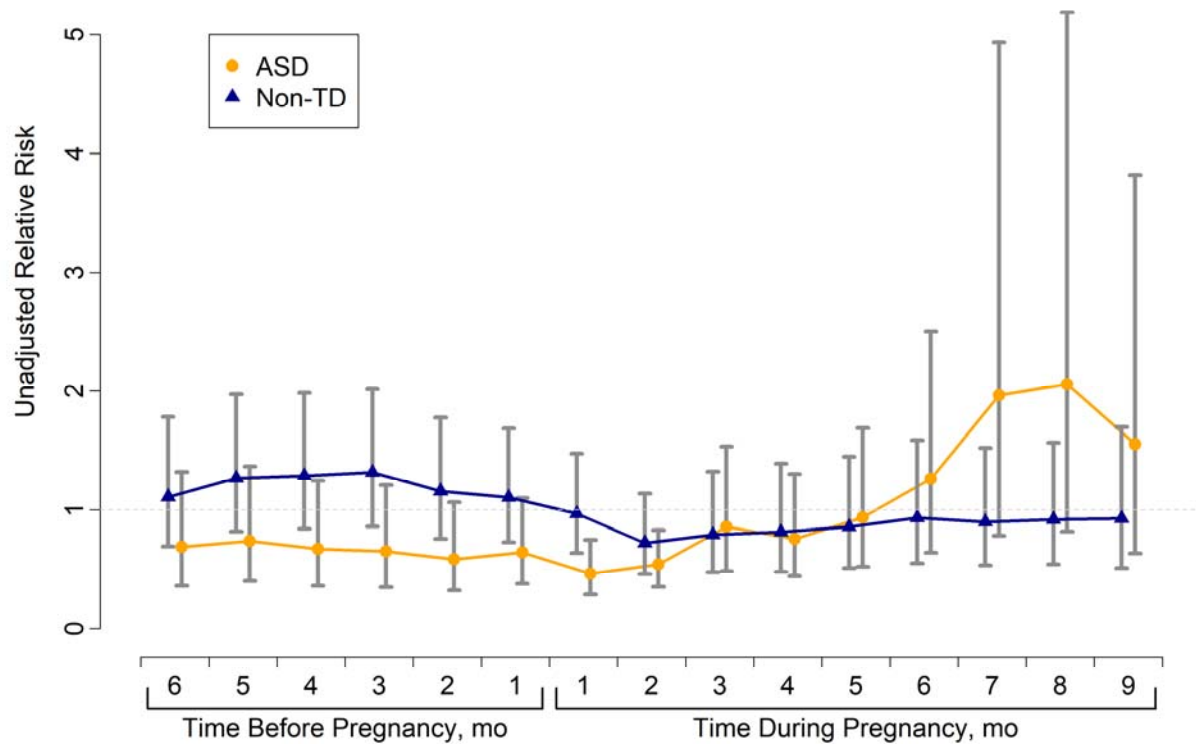

**eFigure 1.** Unadjusted Relative Risk for Associations of Maternal Prenatal Vitamin Use (Yes versus No) For Each Month From 6 Months Before Pregnancy Through the End of Pregnancy With Child 36-month Outcomes of Autism Spectrum Disorder (ASD) and Nontypical Development (Non-TD) Versus Typical Development. Vertical bars represent 95% confidence intervals.

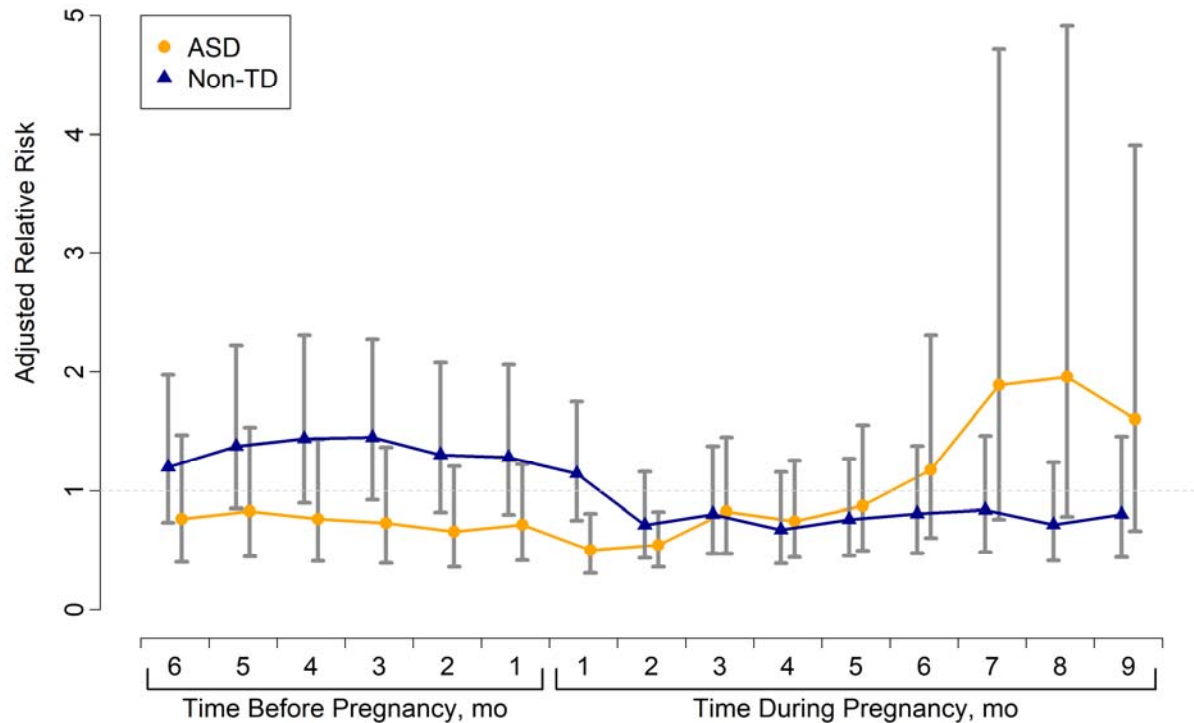

**eFigure 2.** Adjusted Relative Risk for Associations of Maternal Prenatal Vitamin Use (Yes versus No) For Each Month From 6 Months Before Pregnancy Through the End of Pregnancy With Child 36-month Outcomes of Autism Spectrum Disorder (ASD) and Nontypical Development (Non-TD) Versus Typical Development.

Relative risks were adjusted for maternal education in the ASD models and for child white or non-white race, maternal age and education, insurance delivery type, and maternal intention to become pregnant in the Non-TD models. Vertical bars represent 95% confidence intervals.



**eTable 1.** Results of the Sensitivity Analyses Using MLE and TMLE Approaches for the 233 Participants With Complete Covariate Data

| Model                       | Child 36-mo Outcome |                    |
|-----------------------------|---------------------|--------------------|
|                             | ASD RR (95% CI)     | Non-TD RR (95% CI) |
| MLE (unadjusted)            | 0.48 (0.29, 0.78)   | 0.96 (0.62, 1.47)  |
| MLE (adjusted) <sup>a</sup> | 0.51 (0.31, 0.83)   | 1.07 (0.71, 1.61)  |
| TMLE - Model 1              | 0.45 (0.27, 0.75)   | 1.10 (0.68, 1.80)  |
| TMLE - Model 2              | 0.50 (0.29, 0.87)   | 1.18 (0.72, 1.92)  |
| TMLE - Model 3              | 0.42 (0.26, 0.70)   | 1.10 (0.68, 1.77)  |
| TMLE - Model 4              | 0.50 (0.31, 0.82)   | 1.22 (0.93, 1.61)  |

Abbreviations: MLE, maximum likelihood estimation; TMLE, targeted maximum likelihood estimation; RR, Relative Risk; ASD, autism spectrum disorder; Non-TD, nontypical development.

<sup>a</sup>Adjusted for maternal education in the ASD model and for child white or non-white race, maternal age and education, insurance delivery type, and maternal intention to become pregnant (yes or no) in the Non-TD model.

TMLE - Model 1: Algorithm estimated using R-package `tmle` and default Super-Learner (SL) library (`SL.glm`, `SL.step`, and `SL.glm.interaction`) with a set of set of covariates similar to primary analyses (child white or non-white race, maternal age and education, insurance delivery type, and maternal intention to become pregnant).

TMLE - Model 2: Algorithm estimated using R-package `tmle` and default SL library (`SL.glm`, `SL.step`, and `SL.glm.interaction`) with a full set of covariates (all covariates in TMLE - Model 1 and child gender and ethnicity, paternal age, maternal pre-pregnancy BMI and place of birth, and home ownership).

TMLE - Model 3: Algorithm computed using R-package `tmle`, user-supplied SL library (`SL.gam`, `SL.randomForest`, and `SL.rpart`) with a set of set of covariates similar to primary analyses (child white or non-white race, maternal age and education, insurance delivery type, and maternal intention to become pregnant).

TMLE - Model 4: Algorithm computed using R-package `tmle`, user-supplied SL library (`SL.gam`, `SL.randomForest`, and `SL.rpart`) with a full set of covariates (all covariates in TMLE - Model 3 and child gender and ethnicity, paternal age, maternal pre-pregnancy BMI and place of birth, and home ownership).

**eTable 2.** Stratified Unadjusted and Adjusted Associations of Maternal Prenatal Vitamin Use in the First Month of Pregnancy and Child 36-month Outcomes

| Variable                              | Frequency taking vitamin (%) |                    |                 | ASD vs. TD                     |                        | Non-TD vs. TD                  |                        |
|---------------------------------------|------------------------------|--------------------|-----------------|--------------------------------|------------------------|--------------------------------|------------------------|
|                                       | ASD<br>(n = 55)              | Non-TD<br>(n = 60) | TD<br>(n = 126) | RR (95% CI)                    | Interaction<br>P-Value | RR (95% CI)                    | Interaction<br>P-Value |
| Child Sex                             |                              |                    |                 |                                |                        |                                |                        |
| No. Male Sex                          | 38                           | 37                 | 65              |                                |                        |                                |                        |
| Male (crude)                          | 16 (42%)                     | 23 (62%)           | 34 (52%)        | 0.77 (0.46, 1.29)              |                        | 1.30 (0.76, 2.22)              |                        |
| No. Female Sex                        | 17                           | 23                 | 61              |                                |                        |                                |                        |
| Female (crude)                        | 2 (12%)                      | 12 (52%)           | 41 (67%)        | 0.11 (0.03, 0.44)              | 0.01                   | 0.64 (0.32, 1.27)              | 0.11                   |
| Male (adjusted <sup>a</sup> )         |                              |                    |                 | 0.86 (0.51, 1.42)              |                        | 1.80 (0.99, 3.28) <sup>#</sup> |                        |
| Female (adjusted <sup>a</sup> )       |                              |                    |                 | 0.11 (0.03, 0.46)              | 0.01                   | 0.75 (0.32, 1.74)              | 0.13                   |
| Child Race                            |                              |                    |                 |                                |                        |                                |                        |
| No. White                             | 36                           | 34                 | 89              |                                |                        |                                |                        |
| White (crude)                         | 11 (31%)                     | 22 (65%)           | 54 (61%)        | 0.41 (0.22, 0.75) <sup>*</sup> |                        | 1.13 (0.62, 2.07)              |                        |
| No. Non-White                         | 19                           | 26                 | 37              |                                |                        |                                |                        |
| Non-White (crude)                     | 7 (37%)                      | 13 (50%)           | 21 (57%)        | 0.58 (0.27, 1.26)              | 0.47                   | 0.85 (0.47, 1.54)              | 0.51                   |
| White (adjusted <sup>a</sup> )        |                              |                    |                 | 0.44 (0.24, 0.83) <sup>*</sup> |                        | 1.32 (0.66, 2.62)              |                        |
| Non-White (adjusted <sup>a</sup> )    |                              |                    |                 | 0.61 (0.28, 1.31)              | 0.53                   | 1.07 (0.57, 2.00)              | 0.48                   |
| Child Ethnicity                       |                              |                    |                 |                                |                        |                                |                        |
| No. Hispanic                          | 21                           | 19                 | 37              |                                |                        |                                |                        |
| Hispanic (crude)                      | 7 (33%)                      | 8 (42%)            | 22 (59%)        | 0.50 (0.24, 1.06) <sup>#</sup> |                        | 0.63 (0.30, 1.33)              |                        |
| No. Non-Hispanic                      | 34                           | 41                 | 89              |                                |                        |                                |                        |
| Non-Hispanic (crude)                  | 11 (32%)                     | 27 (66%)           | 53 (60%)        | 0.44 (0.24, 0.82) <sup>*</sup> | 0.80                   | 1.21 (0.70, 2.07)              | 0.17                   |
| Hispanic (adjusted <sup>a</sup> )     |                              |                    |                 | 0.57 (0.26, 1.23)              |                        | 0.81 (0.32, 2.07)              |                        |
| Non-Hispanic (adjusted <sup>a</sup> ) |                              |                    |                 | 0.46 (0.25, 0.86) <sup>*</sup> | 0.73                   | 1.29 (0.69, 2.43)              | 0.29                   |

**Supplement eTable 2. (continued)** Stratified Unadjusted and Adjusted Associations of Maternal Prenatal Vitamin Use in the First Month of Pregnancy and Child 36-Month Outcomes

| Variable                                   | Frequency taking vitamin (%) |                    |                 | ASD vs. TD                     |                        | Non-TD vs. TD     |                        |
|--------------------------------------------|------------------------------|--------------------|-----------------|--------------------------------|------------------------|-------------------|------------------------|
|                                            | ASD<br>(n = 55)              | Non-TD<br>(n = 60) | TD<br>(n = 126) | RR (95% CI)                    | Interaction<br>P-Value | RR (95% CI)       | Interaction<br>P-Value |
| Child Mullen Composite Score <sup>b</sup>  |                              |                    |                 |                                |                        |                   |                        |
| No. 70 or higher                           | 25                           | 52                 | 126             |                                |                        |                   |                        |
| 70 or higher (crude)                       | 7 (28%)                      | 30 (58%)           | 75 (60%)        | 0.33 (0.15, 0.74)*             |                        | 0.95 (0.60, 1.50) |                        |
| No. < 70                                   | 22                           | 6                  | 0               |                                |                        |                   |                        |
| < 70 (crude) <sup>d</sup>                  | 7 (32%)                      | 3 (50%)            | –               | 0.38 (0.16, 0.87)*             | NA <sup>c</sup>        | 0.69 (0.15, 3.30) | NA <sup>c</sup>        |
| 70 or higher (adjusted <sup>a</sup> )      |                              |                    |                 | 0.33 (0.15, 0.76)*             |                        | 1.13 (0.71, 1.80) |                        |
| < 70 (adjusted <sup>a</sup> ) <sup>d</sup> |                              |                    |                 | 0.44 (0.19, 1.01) <sup>#</sup> | NA <sup>c</sup>        | –                 | NA <sup>c</sup>        |
| Maternal Age (Years)                       |                              |                    |                 |                                |                        |                   |                        |
| No. 35 or older                            | 27                           | 29                 | 48              |                                |                        |                   |                        |
| 35 or older (crude)                        | 10 (37%)                     | 15 (52%)           | 30 (63%)        | 0.51 (0.27, 0.97)*             |                        | 0.76 (0.43, 1.35) |                        |
| 35 or older                                | 28                           | 31                 | 78              |                                |                        |                   |                        |
| No. < 35                                   | 8 (29%)                      | 20 (65%)           | 45 (58%)        | 0.40 (0.19, 0.83)*             | 0.61                   | 1.23 (0.66, 2.31) | 0.27                   |
| 35 or older (adjusted <sup>a</sup> )       |                              |                    |                 | 0.53 (0.28, 1.02) <sup>#</sup> |                        | 0.95 (0.45, 1.97) |                        |
| < 35 (adjusted <sup>a</sup> )              |                              |                    |                 | 0.47 (0.23, 0.94)*             | 0.43                   | 1.39 (0.75, 2.57) | 0.47                   |

Abbreviations: ASD, autism spectrum disorder; Non-TD, nontypical development; TD, typical development.

<sup>a</sup>Adjusted for maternal education in the ASD model and for child white or non-white race, maternal age and education, insurance delivery type, and maternal intention to become pregnant (yes or no) in the Non-TD model.

<sup>b</sup>Frequency data missing for 8 children in ASD group and 2 in Non-TD.

<sup>c</sup>Estimates were not reported and interaction *p*-values were not calculated when expected cell sizes (based on the margin totals) were less than 5 and due to quasi-complete separation in the logistic models.

<sup>d</sup>The reference group for this models is the TD group; \**p* < .05; #*p* < .10.

**eTable 3.** Results of the Sensitivity Analyses Examining Associations of Maternal Mean Daily Intake of Folic Acid and Iron Supplements in the First Month of Pregnancy With Child 36-month Outcome Using MLE and TMLE Approaches for the 233 Participants With Complete Covariate Data

|                             | ASD                                  |                                      | Non-TD                               |                                      |
|-----------------------------|--------------------------------------|--------------------------------------|--------------------------------------|--------------------------------------|
|                             | RR (95% CI)                          |                                      | RR (95% CI)                          |                                      |
|                             | Tertile 2 vs. Tertile 1 <sup>a</sup> | Tertile 3 vs. Tertile 1 <sup>a</sup> | Tertile 2 vs. Tertile 1 <sup>a</sup> | Tertile 3 vs. Tertile 1 <sup>a</sup> |
| <b>Folic Acid</b>           |                                      |                                      |                                      |                                      |
| MLE (unadjusted)            | 0.66 (0.41, 1.05)                    | 0.41 (0.17, 0.97)                    | 0.94 (0.57, 1.55)                    | 1.05 (0.58, 1.89)                    |
| MLE (adjusted) <sup>b</sup> | 0.68 (0.43, 1.08)                    | 0.46 (0.19, 1.10)                    | 1.04 (0.65, 1.66)                    | 1.26 (0.67, 2.35)                    |
| TMLE - Model 1              | 0.68 (0.43, 1.08)                    | 0.24 (0.10, 0.60)                    | 1.02 (0.63, 1.65)                    | 1.78 (1.01, 3.14)                    |
| TMLE - Model 2              | 0.67 (0.44, 1.01)                    | 0.22 (0.09, 0.52)                    | 1.10 (0.73, 1.66)                    | 1.77 (1.16, 2.70)                    |
| TMLE - Model 3              | 0.65 (0.43, 0.98)                    | 0.26 (0.11, 0.59)                    | 1.03 (0.65, 1.63)                    | 1.76 (1.06, 2.92)                    |
| TMLE - Model 4              | 0.63 (0.47, 0.85)                    | 0.44 (0.31, 0.61)                    | 1.16 (0.84, 1.61)                    | 1.59 (1.13, 2.23)                    |
| <b>Iron</b>                 |                                      |                                      |                                      |                                      |
| MLE (unadjusted)            | 0.58 (0.33, 1.01)                    | 0.54 (0.31, 0.97)                    | 0.79 (0.48, 1.30)                    | 0.72 (0.43, 1.22)                    |
| MLE (adjusted) <sup>b</sup> | 0.61 (0.35, 1.05)                    | 0.57 (0.32, 1.01)                    | 0.85 (0.52, 1.38)                    | 0.78 (0.47, 1.28)                    |
| TMLE - Model 1              | 0.54 (0.31, 0.95)                    | 0.57 (0.32, 1.03)                    | 0.89 (0.54, 1.47)                    | 0.74 (0.40, 1.34)                    |
| TMLE - Model 2              | 0.59 (0.36, 0.97)                    | 0.59 (0.35, 1.00)                    | 0.79 (0.50, 1.25)                    | 0.69 (0.44, 1.08)                    |
| TMLE - Model 3              | 0.56 (0.33, 0.96)                    | 0.56 (0.32, 0.98)                    | 0.89 (0.55, 1.45)                    | 0.80 (0.49, 1.31)                    |
| TMLE - Model 4              | 0.60 (0.39, 0.92)                    | 0.61 (0.37, 1.02)                    | 0.74 (0.56, 0.98)                    | 0.77 (0.59, 1.02)                    |

Abbreviations: MLE, maximum likelihood estimation; TMLE, targeted maximum likelihood estimation; RR, Relative Risk; ASD, autism spectrum disorder; Non-TD, nontypical development.

<sup>a</sup>TMLE algorithms were implemented separately for Tertile 2 vs. Tertile 1 and Tertile 3 vs. Tertile 1 comparisons.

<sup>b</sup>Adjusted for maternal education in the ASD model and for child white or non-white race, maternal age and education, insurance delivery type, and maternal intention to become pregnant (yes or no) in the Non-TD model.

TMLE - Model 1: Algorithm estimated using R-package tmle and default Super-Learner (SL) library (SL.glm, SL.step, and SL.glm.interaction) with a set of set of covariates similar to primary analyses (child white or non-white race, maternal age and education, insurance delivery type, and maternal intention to become pregnant).

TMLE - Model 2: Algorithm estimated using R-package tmle and default SL library (SL.glm, SL.step, and SL.glm.interaction) with a full set of covariates (all covariates in TMLE - Model 1

and child gender and ethnicity, paternal age, maternal pre-pregnancy BMI and place of birth, and home ownership).

TMLE - Model 3: Algorithm computed using R-package tmle, user-supplied SL library (SL.gam, SL.randomForest, and SL.rpart) with a set of set of covariates similar to primary analyses (child white or non-white race, maternal age and education, insurance delivery type, and maternal intention to become pregnant).

TMLE - Model 4: Algorithm computed using R-package tmle, user-supplied SL library (SL.gam, SL.randomForest, and SL.rpart) with a full set of covariates (all covariates in TMLE - Model 3 and child gender and ethnicity, paternal age, maternal pre-pregnancy BMI and place of birth, and home ownership).
